# Supplementary material for: RFWD3 and translesion DNA polymerases contribute to PCNA modification–dependent DNA damage tolerance
Source: Life Sci Alliance. 2022 Jul 29;5(12):e202201584. doi: 10.26508/lsa.202201584 (PMC9348633; doi:10.26508/lsa.202201584)
Supplement: Supplementary file 3 [file LSA-2022-01584_TableS1.xlsx]

## Sheet: List of genes in the library
RefSeq Accession Number	Gene Symbol
NM_001082486	ACD
NM_001096	ACLY
NM_000687	AHCY
NM_001001655	ALKBH2
NM_139178	ALKBH3
NM_001641	APEX1
NM_014481	APEX2
NM_198544	APITD1
NM_017692	APTX
NM_006010	ARMET
NM_024857	ATAD5
NM_000332	ATXN1
NM_004993	ATXN3
NM_000465	BARD1
NM_080703	BAT3
NM_000057	BLM
NM_033197	BPIFB1
NM_007294	BRCA1
NM_000059	BRCA2
NM_001018055	BRCC3
NM_032043	BRIP1
NM_001009997	C10orf62
NM_020193	C11orf30
NM_031465	C12orf32
NM_017915	C12orf48
NM_152259	C15orf42
NM_025161	C17orf70
NM_152266	C19orf40
NM_182533	C1orf86
NM_016481	C9orf156
NM_001024649	CANX
NM_199141	CARM1
NM_007276	CBX3
NM_001239	CCNH
NM_006430	CCT4
NM_012073	CCT5
NM_003504	CDC45
NM_001254	CDC6
NM_030928	CDT1
NM_014956	CEP164
NM_004344	CETN2
NM_018223	CHFR
NM_001827	CKS2
NM_004898	CLOCK
NM_022111	CLSPN
NM_000089	COL1A2
NM_004766	COPB2
NM_001312	CRIP2
NM_016190	CRNN
NM_014881	DCLRE1A
NM_022836	DCLRE1B
NM_001033855	DCLRE1C
NM_001923	DDB1
NM_000107	DDB2
NM_016355	DDX47
NM_001363	DKC1
NM_007068	DMC1
NM_001080449	DNA2
NM_080820	DTD1
NM_004423	DVL3
NM_001083588	E2F5
NM_024757	EHMT1
NM_014740	EIF4A3
NM_152463	EME1
NM_173627	ENDOV
NM_001983	ERCC1
NM_000400	ERCC2
NM_000122	ERCC3
NM_005236	ERCC4
NM_000123	ERCC5
NM_000124	ERCC6
NM_001007234	ERCC8
NM_004450	ERH
NM_018199	EXD2
NM_003686	EXO1
NM_004456	EZH2
NM_139076	FAM175A
NM_000135	FANCA
NM_001018113	FANCB
NM_000136	FANCC
NM_001018115	FANCD2
NM_021922	FANCE
NM_022725	FANCF
NM_004629	FANCG
NM_018193	FANCI
NM_018062	FANCL
NM_020937	FANCM
NM_004111	FEN1
NM_004960	FUS
NM_005754	G3BP1
NM_182625	GEN1
NM_021067	GINS1
NM_016095	GINS2
NM_022770	GINS3
NM_032336	GINS4
XM_942007	GMNC
NM_015895	GMNN
NM_031485	GRWD1
NM_005316	GTF2H1
NM_001515	GTF2H2
NM_001516	GTF2H3
NM_001517	GTF2H4
NM_207118	GTF2H5
NM_002105	H2AFX
NM_002106	H2AFZ
NM_133636	HELQ
NM_031243	HNRNPA2B1
NM_003299	HSP90B1
NM_002156	HSPD1
NM_002157	HSPE1
NM_004507	HUS1
NM_013417	IARS
NM_005534	IFNGR2
NM_004515	ILF2
NM_015434	INTS7
NM_006854	KDELR2
NM_001029989	KIAA0101
NM_021174	KIAA1967
NM_002266	KPNA2
NM_005566	LDHA
NM_000234	LIG1
NM_002311	LIG3
NM_002312	LIG4
NM_005358	LMO7
XM_926025	LOC642536
NM_006341	MAD2L2
NM_018518	MCM10
NM_004526	MCM2
NM_002388	MCM3
NM_005914	MCM4
NM_006739	MCM5
NM_005915	MCM6
NM_005916	MCM7
NM_032485	MCM8
NM_153255	MCM9
NM_014641	MDC1
NM_002392	MDM2
NM_002393	MDM4
NM_004992	MECP2
NM_004774	MED1
NM_130801	MEN1
NM_002412	MGMT
NM_000249	MLH1
NM_001040108	MLH3
NM_005933	MLL
NM_022362	MMS19
NM_198468	MMS22L
NM_002431	MNAT1
NM_001015052	MPG
NM_005590	MRE11A
NM_007208	MRPL3
NM_021107	MRPS12
NM_000251	MSH2
NM_002439	MSH3
NM_002440	MSH4
NM_025259	MSH5
NM_000179	MSH6
NM_006636	MTHFD2
NM_014967	MTMR15
NM_025128	MUS81
NM_001048171	MUTYH
NM_001002841	MYL4
NM_002485	NBN
NM_001042540	NCBP2
NM_024608	NEIL1
NM_145043	NEIL2
NM_018248	NEIL3
NM_013432	NFKBIL2
NM_024782	NHEJ1
NM_007363	NONO
NM_002528	NTHL1
NM_002452	NUDT1
NM_006185	NUMA1
NM_015135	NUP205
NM_001031716	OBFC2A
NM_024068	OBFC2B
NM_016819	OGG1
NM_181673	OGT
NM_002573	PAFAH1B3
NM_001079524	PAICS
NM_024675	PALB2
NM_001618	PARP1
NM_001042618	PARP2
NM_007349	PAXIP1
NM_002592	PCNA
NM_016483	PHF7
NM_000534	PMS1
NM_000535	PMS2
NM_001003686	PMS2L3
NM_002690	POLB
NM_002691	POLD1
NM_006231	POLE
NM_002693	POLG
NM_006502	POLH
NM_007195	POLI
NM_016218	POLK
NM_013274	POLL
NM_013284	POLM
NM_181808	POLN
NM_199420	POLQ
NM_001042594	POT1
NM_005809	PRDX2
NM_006406	PRDX4
NM_198318	PRMT1
NM_001039619	PRMT5
NM_006503	PSMC4
NM_002818	PSME2
NM_002823	PTMA
NM_002853	RAD1
NM_002873	RAD17
NM_020165	RAD18
NM_005053	RAD23A
NM_002874	RAD23B
NM_005732	RAD50
NM_133487	RAD51
NM_006479	RAD51AP1
XM_001130373	RAD51AP2
NM_002876	RAD51C
NM_002877	RAD51L1
NM_002878	RAD51L3
NM_134424	RAD52
NM_012415	RAD54B
NM_003579	RAD54L
NM_004584	RAD9A
NM_152442	RAD9B
NM_002894	RBBP8
NM_002896	RBM4
NM_001034836	RDM1
NM_032941	RECQL
NM_004260	RECQL4
NM_001003715	RECQL5
NM_001037872	REV1
NM_002912	REV3L
NM_002916	RFC4
NM_018124	RFWD3
NM_018151	RIF1
NM_024945	RMI1
NM_152308	RMI2
NM_152617	RNF168
NM_003958	RNF8
NM_002945	RPA1
NM_002946	RPA2
NM_002947	RPA3
NM_013347	RPA4
NM_000977	RPL13
NM_000988	RPL27
NM_007209	RPL35
NM_001033	RRM1
NM_001034	RRM2
NM_015713	RRM2B
NM_016434	RTEL1
NM_001035511	SDHC
NM_006304	SHFM1
NM_001015000	SLX1A
NM_178044	SLX1B
NM_032444	SLX4
NM_014311	SMUG1
NM_014390	SND1
NM_003094	SNRPE
NM_003095	SNRPF
NM_003107	SOX4
NM_012444	SPO11
NM_003143	SSBP1
NM_003144	SSR1
NM_144998	STRA13
NM_007375	TARDBP
NM_152295	TARS
NM_024665	TBL1XR1
NM_003211	TDG
NM_001008744	TDP1
NM_016111	TELO2
NM_017489	TERF1
NM_005652	TERF2
NM_018975	TERF2IP
NM_198253	TERT
NM_003244	TGIF1
NM_005119	THRAP3
NM_003920	TIMELESS
NM_012461	TINF2
NM_017858	TIPIN
NM_018247	TMEM30A
NM_003747	TNKS
NM_001067	TOP2A
NM_007027	TOPBP1
NM_000546	TP53
NM_005657	TP53BP1
NM_012112	TPX2
NM_004295	TRAF4
NM_004412	TRDMT1
NM_016381	TREX1
NM_080701	TREX2
NM_005762	TRIM28
NM_003313	TSTA3
NM_178014	TUBB
NM_003336	UBE2A
NM_003337	UBE2B
NM_003348	UBE2N
NM_014176	UBE2T
NM_016290	UIMC1
NM_003362	UNG
NM_002911	UPF1
NM_007126	VCP
NM_020839	WDR48
NM_024102	WDR77
NM_000553	WRN
NM_020135	WRNIP1
NM_020196	XAB2
NM_000380	XPA
NM_004628	XPC
NM_006297	XRCC1
NM_005431	XRCC2
NM_005432	XRCC3
NM_022550	XRCC4
NM_021141	XRCC5
NM_001469	XRCC6
NM_015642	ZBTB20
NM_015336	ZDHHC17

## Sheet: Ranking
	2mg/ml, 1 h				75 ng/ml, 4 d
	mock	siCtrl	siP21	siP53	mock	siCtrl	siP21	siP53	2nd siRNA
ranking
1	PARP1	TGIF1	SPO11	FLT4	EIF4A3	EIF4A3	REV3L	AHCY
2	CCT5	EIF4A3	ATR	MAD2L2	C15orf42	NEIL1	NUP205	ATAD5
3	CAMK2D	OGG1	FLT4	ATR	FANCG	POLE	FANCG	REV3L
4	OBFC2B	FLT4	REV3L	REV3L	MAD2L2	RPL27	RFWD3	TIMELESS
5	POLB	EXO1	FRK	RFWD3	MDM4	NUP205	EIF4A3	RPL13
6	FANCG	CEP164	OBFC2B	FYN	BRCA1	REV3L	C19orf40	EIF4A3
7	NEIL1	MCM9	RFWD3	MSH6	TGIF1	TIMELESS	POLE	MAD2L2
8	CEP164	TELO2	BRCA1	FANCG	WDR48	RMI2	GRWD1	RFWD3
9	MAD2L2	RMI1	TERT	BRCA1	CETN2	CETN2	RNF168	TELO2
10	TGIF1	POLB	TIPIN	FRK	RAD51L1	FANCM	HUS1	RPA1
11	TERT	NHEJ1	ERCC1	ABL2	UIMC1	FANCG	PALB2	REV1
12	PRDX4	NEIL1	GALK2	POLB	POLE	MDC1	TREX1	RAD17
13	EIF4A3	PAXIP1	ABL2	EXO1	MED1	RAD17	FANCD2	NUP205
14	FYN	MAD2L2	TELO2	ERCC6	CLSPN	RIF1	WDR48	BRCA1
15	RAD51AP2	ATR	MSH4	GALK1	NEIL1	MED1	TELO2	ERCC6
16	EHMT1	GEN1	NEIL1	ERCC1	PTMA	ACD	FANCM	MDC1
17	BRIP1	KIAA1967	PRMT5	TELO2	CANX	TMEM30A	FANCE	NFKBIL2
18	RTEL1	FANCG	PARP1	MCM9	TRDMT1	RAD23B	RMI2	RMI2
19	BTK	RAD51AP2	MAD2L2	DCLRE1A	NFKBIL2	BRCC3	SLX4	FANCG
20	RMI1	TDP1	ERCC6	RAD17	FAM175A	OBFC2A	MCM10	TRIM28
21	GEN1	MED1	POLB	C12orf48	BRIP1	EXO1	RPL35	RNF168
22	OGG1	RAD17	FYN	ERH	APEX2	FANCI	LDHA	ERH
23	DGKB	EHMT1	CLOCK	TERT	TMEM30A	CRNN	MAD2L2	MCM8
24	KIAA1967	NUMA1	MCM9	EPHA7	FANCF	RMI1	SHFM1	FANCD2
25	GMNC	MRPL3	LMO7	MED1	TELO2	SLX4	GEN1	C12orf48
26	BMPR1B	NUP205	ERCC3	NUMA1	TREX1	ALKBH3	C12orf32	FANCI
27	ALKBH3	RPL27	MDC1	GMNN	ATXN3	TREX1	RAD54L	DCLRE1C
28	MCM9	BRCC3	GRK4	GRK4	EXO1	MCM8	HNRNPA2B1	HUS1
29	CANX	CETN2	E2F5	CANX	C19orf40	RAD51L1	C1orf86	C11orf30
30	MED1	ENDOV	MRPL3	ACVR2B	MDC1	C19orf40	FANCB	TRAF4
31	MUTYH	TERT	CEP164	TRDMT1	RIF1	C17orf70	CDT1	NEIL1
32	SPO11	OBFC2A	XRCC4	MUS81	OGG1	TGIF1	GINS3	RNF8
33	H2AFZ	POLK	GALK1	BMPR1B	H2AFZ	ACLY	H2AFX	MUS81
34	C19orf40	ACVR1	SHFM1	LIG3	SLX4	C12orf32	KIAA1967	SLX4
35	PAXIP1	ALKBH3	BRIP1	RAD51L1	COL1A2	ATXN3	RPL13	MCM9
36	COL1A2	COL1A2	RECQL4	AK3L1	REV3L	STRA13	BRIP1	C15orf42
37	GCKR	C19orf40	RAD51AP2	GCK	ENDOV	RAD51AP2	BPIFB1	ACD
38	ERCC6	PMS1	PALB2	ACVR1	SSR1	H2AFZ	RAD17	MED1
39	CD2	NBN	GMNN	GALK2	SDHC	PAXIP1	BRCA1	ENDOV
40	WDR48	CANX	HNRNPA2B1	RECQL5	SND1	COL1A2	OBFC2B	POLE
41	PAFAH1B3	BMPR1B	CCT5	CRNN	RAD17	MAD2L2	WDR77	EXO1
42	PARP2	ADRBK2	FGFR1	TIMELESS	RAD51AP2	TELO2	NHEJ1	GMNC
43	RAD17	MTMR15	ACVR1	ADRBK2	GTF2H3	OGT	GINS4	RIF1
44	RAD51L1	OBFC2B	EHMT1	TGIF1	ATAD5	WDR77	RPL27	APITD1
45	REV1	ERCC1	LIG3	OGT	SHFM1	RFWD3	RAD9A	CLSPN
46	MAP3K8	STRA13	ADRBK2	GMNC	BAT3	POLK	GMNC	RAD51AP1
47	RMI2	ATXN3	CDC6	EHMT1	THRAP3	PAFAH1B3	ENDOV	FANCM
48	ABL2	PRKD3	EXO1	EPHB6	DCLRE1C	ENDOV	UIMC1	CRNN
49	ALKBH2	MUS81	MLH1	REV1	RMI2	PALB2	COPB2	UPF1
50	TMEM30A	AK3L1	AMHR2	BMPR2	ALKBH2	C9orf156	MLH3	FANCB
51	UBE2B	BMPR2	BMPR1B	PALB2	FANCD2	FANCF	ALKBH2	C19orf40
52	TELO2	THRAP3	OGT	RPL13	NUMA1	NUMA1	C10orf62	CANX
53	MLH3	FANCB	MUS81	APITD1	RMI1	ALKBH2	RDM1	CETN2
54	POLK	ACVR2B	C12orf48	AK2	FANCB	RDM1	RPA3	XRCC3
55	MCM5	MDC1	LIG1	FANCB	RAD52	KIAA1967	DCLRE1C	RPL35
56	AK3L1	C10orf62	TRDMT1	CAMK2B	CRIP2	PRMT5	MUS81	NBN
57	CBX3	DAPK3	GK	XRCC3	OBFC2A	PTMA	NUMA1	LIG1
58	PMS1	TMEM30A	TMEM30A	LMO7	PARP1	NFKBIL2	CCNH	PALB2
59	HSPD1	POLE	ACLY	RAD51AP2	C10orf62	OGG1	MNAT1	GEN1
60	RPL35	PARP2	FANCG	MDC1	ERCC6	C12orf48	C11orf30	NUMA1
61	TBL1XR1	APITD1	MSH2	MRPL3	EHMT1	FANCB	TIMELESS	FANCE
62	NUMA1	CSNK2A1	PMS1	TMEM30A	REV1	PARP1	FANCI	H2AFZ
63	SSBP1	CD2	BRCA2	TINF2	NBN	RPL13	MRPS12	WDR48
64	INSR	TINF2	ERH	MRE11A	GMNC	GRWD1	RMI1	BRCA2
65	C15orf42	ABL2	CKS2	NEIL1	GRWD1	GEN1	BRCA2	GRWD1
66	CSNK1G3	TBL1XR1	MED1	OBFC2A	DCLRE1B	HSPE1	MCM2	HELQ
67	PTMA	HIPK3	MECP2	MECP2	OGT	GTF2H2	H2AFZ	SSR1
68	BRCC3	PAFAH1B3	C10orf62	AKT2	ACLY	NBN	ATAD5	TREX1
69	TRDMT1	CLK1	GCK	CDK5	C12orf32	TRDMT1	FANCA	RAD51AP2
70	CSNK2A1	ARMET	BMPR2	UIMC1	GTF2H4	TBL1XR1	FAM175A	GINS4
71	PSME2	RIF1	ERCC4	XRCC4	STRA13	FAM175A	POLB	CLOCK
72	ENDOV	DCLRE1A	POLG	ERCC2	C9orf156	WDR48	MMS22L	MEN1
73	CRIP2	RAD51AP1	KPNA2	POLK	OBFC2B	HUS1	ERCC6	RAD51L1
74	CHUK	GALK2	SOX4	BTK	RAD18	UPF1	REV1	EME1
75	CSNK2A2	REV3L	FUS	PARP1	SSBP1	MUTYH	SOX4	WDR77
76	ERCC1	DGKA	TREX1	CLK1	HUS1	SLX1B	MRPL3	LOC642536
77	BRAF	DTD1	BAT3	EPHA5	CLOCK	FANCE	RAD51	SOX4
78	CCNH	RMI2	TRIM28	MTMR15	POLB	MUS81	RAD51AP2	LDHA
79	ATR	RAD51L1	RAD17	CDK9	CEP164	ERCC6	SSR1	NHEJ1
80	XRCC4	TIMELESS	RPA3	FER	C12orf48	THRAP3	GMNN	GINS3
81	HIPK3	KIAA0101	XPA	SDHC	H2AFX	RFC4	HELQ	FANCA
82	CETN2	C12orf32	ADK	TRIM28	PAXIP1	PARP2	XRCC4	C12orf32
83	DGKA	Ave. Mock	ATM	BLK	BPIFB1	TRAF4	MDC1	H2AFX
84	CAMK2B	CSNK1G3	MRE11A	RIF1	CDT1	APITD1	NEIL1	ATR
85	C12orf32	CRNN	ARMET	OBFC2B	SLX1A	C10orf62	EXO1	DCLRE1B
86	MRPL3	WDR77	GCKR	ERCC3	FANCM	RNF168	POLK	HSPE1
87	FANCD2	SSBP1	PAXIP1	CEP164	HSPE1	REV1	BRCC3	GINS1
88	C10orf62	RECQL	POLK	ADK	POLH	NHEJ1	TMEM30A	RECQL5
89	ADRBK2	PTMA	MSH6	FUS	TIMELESS	ATR	GINS1	LIG4
90	KDR	CRIP2	MAP3K8	XPA	ERCC4	CEP164	OGT	GTF2H1
91	RAD18	H2AFZ	POLD1	C10orf62	MECP2	CANX	LIG1	PSME2
92	CALM3	ALKBH2	RAD9A	LIG1	FUS	ERH	FANCF	FANCF
93	DYRK1A	FRK	TNKS	MLH1	GEN1	H2AFX	LOC642536	BAT3
94	DGUOK	KDR	GK2	UBE2N	PALB2	TNKS	IARS	PAFAH1B3
95	MSH2	PIP4K2B	NUDT1	SHFM1	PAFAH1B3	KIAA0101	BAT3	KIAA1967
96	BMPR2	MRPS12	ERBB3	ATM	MSH2	MRPS12	FANCC	IFNGR2
97	CHKA	C9orf156	DDB1	EPHA3	PARP2	MCM9	TOPBP1	UBE2N
98	FANCC	STK24	SLX4	RAD18	ERCC2	ERCC2	TRIM28	COL1A2
99	GRWD1	LOC642536	FER	SPO11	CCT4	SLX1A	GTF2H5	ILF2
100	CAMK2G	MLH3	AXL	ARMET	SLX1B	PSME2	PSME2	TMEM30A
101	MDC1	XRCC4	CDK9	ERBB3	POLK	BAT3	PRMT5	MSH5
102	CAMK2A	RAD23B	DCLRE1A	FANCF	BRCC3	OBFC2B	ATXN3	C1orf86
103	OGT	GRWD1	RAD51AP1	Ave. Mock	ALKBH3	MRPL3	POLG	THRAP3
104	FAM175A	EPHB6	MCM6	GAK	RFWD3	CDT1	RAD51L1	C9orf156
105	CAMK4	CAMK2G	RECQL5	CLOCK	FANCI	HELQ	XRCC3	BLM
106	CDK8	FANCM	EPHB6	MAP3K8	TERT	FUS	PMS1	KPNA2
107	UBE2A	CSNK2A2	RAD1	GCKR	RBBP8	RAD50	SDHC	BRCC3
108	NFKBIL2	FLT3	DDB2	H2AFX	LOC642536	LIG3	MCM9	GTF2H5
109	FANCB	CDK8	BLK	RAD1	RPA4	SSR1	TBL1XR1	RMI1
110	MTMR15	FGR	EZH2	C11orf30	KIAA1967	UIMC1	NBN	ATXN1
111	FRK	RAD9B	LOC642536	RAD9A	EME1	LIG1	LMO7	RAD54L
112	OBFC2A	GTF2H2	AKT2	RAD52	WRNIP1	RAD1	TIPIN	UIMC1
113	TINF2	BRIP1	ATAD5	FANCD2	ERCC1	RAD9A	CCT4	CDK9
114	XPA	GMNC	DYRK1A	BAT3	CRNN	KPNA2	ILF2	NUDT1
115	Ave. Mock	SPO11	MUTYH	XPC	BMX	MLH1	STRA13	TGIF1
116	CDT1	DMPK	TINF2	LOC642536	MCM8	LOC642536	PAXIP1	MRPL3
117	CLK1	DYRK1A	ACVR2A	FGFR1	MLH1	GTF2H4	ARMET	CARM1
118	ACVR1	HSPD1	RAD18	CCNH	NTHL1	ERCC3	ACD	DCLRE1A
119	ACVR2B	MAP3K8	XRCC3	POLG	MGMT	DTD1	MSH6	POT1
120	GALK2	ADK	HIPK3	MCM5	GTF2H5	DCLRE1A	TRAF4	SLX1A
121	STRA13	DGKB	RFC4	HUS1	WDR77	ERCC1	IFNGR2	ALKBH2
122	NBN	PALB2	RNF8	HSPE1	KPNA2	DMC1	RECQL5	STRA13
123	THRAP3	CAMK2B	GRWD1	ERCC4	DMC1	HNRNPA2B1	UBE2N	BPIFB1
124	POLI	UNG	CDK8	PMS1	DCLRE1A	EME1	PARP1	FUS
125	AK1	GK	APEX1	UPF1	EZH2	MNAT1	UPF1	RAD51
126	RECQL	HSPE1	FANCD2	IRAK2	APITD1	MLH3	EME1	ACVR2A
127	BPIFB1	RPA4	IFNGR2	PAFAH1B3	UPF1	C1orf86	MCM6	AKT1
128	LIG3	FYN	REV1	BRIP1	UNG	APEX1	DNA2	RAD9A
129	KHK	NUAK1	NONO	EGFR	DDB2	BRCA1	LIG4	PRKAA1
130	MAST2	XPA	MAPKAPK2	ACVR1B	MRPL3	BPIFB1	POLH	XRCC6
131	RAD9A	DTYMK	Ave. Mock	CSNK2A1	ERCC3	SDHC	C15orf42	CDT1
132	DCLRE1A	GRK4	CCT4	EPHB2	MUS81	MSH2	CLOCK	XRCC4
133	ATXN3	OGT	CANX	MSH2	RAD50	POLB	HSPE1	SDHC
134	FANCF	RDM1	POLE	DCK	CAMK4	RAD51AP1	TGIF1	MPG
135	MUS81	IRAK2	ILF2	CBX3	MNAT1	CRIP2	RNF8	DKC1
136	MRPS12	PI4KA	FGFR2	MATK	PSME2	CDK10	RECQL4	PDGFRL
137	RPA4	MATK	MCM7	C19orf40	PRMT1	MEN1	FEN1	FAM175A
138	MMS19	PIK3R4	EPHB1	THRAP3	RNF168	UBE2N	CETN2	FEN1
139	JAK3	DGUOK	GTF2H3	DTYMK	CKS2	DCLRE1C	MUTYH	ACLY
140	CKM	MOK	RAD52	CKS2	Ave. Mock	RECQL5	ALKBH3	FANCC
141	STK24	JAK3	BPIFB1	DMC1	DYRK1A	TRIM28	POLD1	DCK
142	DCLRE1C	NME5	HELQ	DYRK1A	RECQL5	TINF2	LIG3	CSNK1D
143	RDM1	GK2	UBE2N	IFNGR2	NUDT1	HSPD1	RIF1	C10orf62
144	NHEJ1	BRAF	BLM	IARS	MRPS12	SOX4	INTS7	PARP1
145	WDR77	DCLRE1B	AK2	RAD51AP1	SOX4	NONO	CDC6	LIG3
146	APITD1	AK1	PAFAH1B3	PSME2	MLH3	ERCC4	ATR	RDM1
147	LOC642536	RAD9A	NBN	DKC1	RAD1	DCLRE1B	KPNA2	ERCC5
148	UBE2T	BTK	TGIF1	MSH4	MCM9	EZH2	TERT	ALKBH3
149	BRCA2	WDR48	MGMT	AKT1	CSNK2A1	BRIP1	KIAA0101	DDX47
150	NUAK1	ERH	FANCA	PAXIP1	GMNN	ERCC5	MDM2	CKM
151	ADK	CDT1	MLL	POLE	MCM3	POLH	XRCC6	TRDMT1
152	DAPK3	HNRNPA2B1	ABL1	FLT3	BUB1	SSBP1	RAD52	MDM2
153	EPHB6	CALM3	KIAA1967	NONO	CCNH	C11orf30	PAFAH1B3	RAD18
154	EPHA7	ERCC3	RAD50	PRPS1L1	MTMR15	MTMR15	RAD18	IARS
155	DTYMK	POLI	RAD51L1	RIPK2	CBX3	DTYMK	MCM5	CEP164
156	GCK	CSF1R	AHCY	CALM1	TBL1XR1	MMS19	CCT5	CSNK2A1
157	POLE	PGK1	CRNN	ALKBH3	HSP90B1	DDB2	APITD1	ACVR1B
158	DCLRE1B	MEN1	PRMT1	MGMT	HSPD1	PMS1	MCM8	TOPBP1
159	PIP4K2B	RFWD3	FANCE	MUTYH	AHCY	RAD52	MGMT	IP6K2
160	C12orf48	CDK10	MTMR15	CRIP2	LIG3	NUDT1	TINF2	MRPS12
161	ERCC3	FER	PTK2B	SOX4	NHEJ1	CCNH	EZH2	EPHB2
162	KIT	ERCC6	SDHC	DGUOK	FANCC	CAMK2G	PMS2L3	CSNK1G3
163	POLD1	PSME2	ERCC5	CLSPN	GINS3	EHMT1	RAD51AP1	MAP3K8
164	ATAD5	DMC1	CARM1	HIPK3	DDR1	PRMT1	ERCC2	MTMR15
165	RIF1	ACD	IRAK2	TREX1	HNRNPA2B1	FEN1	CRNN	GMNN
166	SLX4	C12orf48	HSP90B1	CKM	NEIL3	FANCC	AHCY	AK2
167	EPHB1	EPHA3	RNF168	OGG1	NUP205	CLOCK	BLM	OGG1
168	PRKD3	MMS19	MATK	GK	XRCC4	TERT	ERCC1	PMS1
169	REV3L	ARAF	CETN2	UBE2A	PMS1	SPO11	CKMT2	TNKS
170	BUB1	FRAP1	CLSPN	SSBP1	MSH4	ARMET	TRDMT1	RECQL4
171	C11orf30	TRDMT1	DTD1	RECQL4	NONO	CARM1	MLH1	MCM3
172	RECQL5	INSR	OBFC2A	ABL1	ARMET	AHCY	ACLY	CSNK1G2
173	NEIL2	BPIFB1	GINS3	NHEJ1	PRMT5	C15orf42	MSH5	CLK1
174	CHFR	DCLRE1C	C19orf40	NUDT1	XRCC1	GMNN	PRMT1	TIPIN
175	IRAK2	FAM175A	CAMK2B	DTD1	DTYMK	POLG	CKS2	CCT5
176	FANCM	PRDX4	FANCB	GEN1	HELQ	MGMT	PRPS1L1	INTS7
177	RFWD3	EPHA1	DCLRE1C	GTF2H5	DAPK3	XRCC4	NFKBIL2	MRE11A
178	MATK	PAICS	FANCM	UNG	UBE2A	GTF2H3	MTMR15	TBL1XR1
179	CSNK1E	AK2	GAK	CD2	JAK3	FANCA	MLL	POLK
180	RNF168	CBX3	RMI1	PRMT1	RECQL4	MECP2	MED1	OBFC2B
181	CLK3	GCKR	RIPK2	PRKAA1	RAD51AP1	BLM	CKM	PRPS1L1
182	MAP4K3	GCK	ARAF	CSNK1D	MTHFD2	XRCC2	APEX1	XPC
183	CLSPN	CCNH	GEN1	DAPK1	TINF2	GMNC	TP53BP1	RAD52
184	GK	SLX4	CALM1	FES	MUTYH	RAD9B	NTHL1	POLB
185	PMS2	EPHA7	INTS7	ACVR2A	MEN1	UNG	PLK3	CDK10
186	XRCC1	EPHB1	CDT1	PI4KA	CAMK2G	AK2	CARM1	OBFC2A
187	GINS3	UBE2N	UPF1	HNRNPA2B1	ACD	MTHFD2	MAP3K8	CHEK1
188	CKB	ABL1	XRCC6	HELQ	LIG1	DYRK2	CEP164	PMS2L3
189	MOK	RAD1	CHEK1	CETN2	POLI	HSP90B1	E2F5	TINF2
190	PI4KA	ERCC8	CDK7	KIAA1967	GCKR	PRKD3	ERH	MDM4
191	DMC1	APTX	CLK1	HSP90B1	C11orf30	CKS2	GTF2H2	FES
192	RAD1	LIG3	ERCC2	FGFR4	UBE2B	NME5	TNKS	CDK8
193	ERH	UBE2A	KIAA0101	ACD	ATR	RAD54B	FUS	ERCC3
194	FRAP1	POLD1	EPHA3	EPHB1	RDM1	PGK1	ERCC5	XPA
195	PALB2	FANCE	EPHA7	EME1	MMS19	FANCL	RAD54B	MOK
196	CKMT1B	FANCC	POLH	GINS3	MAST2	GTF2H5	TUBB	POLG
197	DTD1	FANCL	EPHA1	RMI2	GK2	EPHA3	MTHFD2	MYL4
198	RAD9B	ERCC2	NHEJ1	CDK8	SPO11	TDP1	RAD1	TDP1
199	CSK	SGK1	TOPBP1	SLX4	FEN1	ATAD5	HSP90B1	GTF2H4
200	SMUG1	MAPKAPK2	ERBB4	PTMA	UBE2N	GINS4	NUDT1	PLK2
201	DAPK1	EXD2	RPL35	ULK1	TNKS	ERBB2	DCLRE1B	MLH1
202	AMHR2	CHKA	PI4KA	TBL1XR1	RNF8	RPA4	COL1A2	PRMT1
203	UNG	PDGFRL	IARS	TBK1	TSTA3	MSH4	RAD50	POLH
204	C9orf156	EPHA5	LIG4	DDB2	TRAF4	RECQL	CLK2	ERCC4
205	ERBB2	CAMK2D	WDR48	C9orf156	RECQL	ATXN1	C12orf48	CSNK2A2
206	PRDX2	C1orf86	NUMA1	ACLY	MAPKAPK2	MCM5	OGG1	RFC4
207	TARDBP	CDK4	RMI2	LIG4	C17orf70	CD2	CLK1	DDB2
208	MAPKAPK2	CAMK4	TBL1XR1	FEN1	IFNGR2	RAD23A	MEN1	SLX1B
209	UIMC1	H2AFX	CDK5	ENDOV	RFC4	LMO7	DCK	DTYMK
210	NME5	WRNIP1	EPHB2	NBN	CDK10	UBE2A	ERCC4	MCM5
211	RPA3	CHFR	NUP205	RNF168	ERH	MMS22L	NONO	CKS2
212	CKS2	REV1	APITD1	PGK1	BLM	ACVR2A	CHFR	PARP2
213	TSTA3	RAD18	RIF1	SSR1	PTK2B	PRDX2	CANX	CDK7
214	RAD50	SLX1A	FEN1	TRAF4	LMO7	MAPKAPK2	MMS19	MECP2
215	FLT4	ATXN1	SGK1	FANCM	ERBB2	POLI	DCLRE1A	APEX1
216	POLH	TARS	TP53BP1	DCLRE1C	MSH3	FGFR4	GTF2H1	TERT
217	XRCC2	TSTA3	ACVR2B	RNF8	ERCC5	E2F5	G3BP1	HSP90B1
218	SHFM1	MAP4K3	GTF2H5	JAK2	GINS4	DYRK1A	CLSPN	ERCC1
219	MTHFD2	MAPK14	ERBB2	AMHR2	XPA	IFNGR2	OBFC2A	OGT
220	C17orf70	ERCC4	HUS1	FANCE	TDP1	CSNK2A1	CLK3	NONO
221	GTF2H2	ACVR1B	GMNC	PRMT5	NEIL2	CDK7	RAD51C	SHFM1
222	CALM2	POLH	STRA13	ATXN1	POLG	EPHB1	ITPK1	MNAT1
223	EME1	UBE2B	MCM5	KDR	CHKA	BMPR2	SLX1A	MAST2
224	EPHB4	FANCF	ATXN3	ACVRL1	GTF2H2	PIK3R4	MOK	PRKDC
225	HNRNPA2B1	EPHA4	FLT1	NFKBIL2	G3BP1	RNF8	PRKD3	BRIP1
226	CDK10	ERBB4	DKC1	DGKA	KDR	CBX3	GTF2H3	KIAA0101
227	BMX	TUBB	NTHL1	MAST2	IARS	ZBTB20	RAD23B	EPHA3
228	LMO7	FGFR1	MCM2	SLX1A	CKMT1B	COASY	ABL1	EPHB6
229	FER	C11orf30	STK24	RAD9B	RAD9A	JAK1	DOK1	CBX3
230	GRK4	EPHB4	FES	TDP1	CDK8	EPHA2	SSBP1	NUAK1
231	FLT3	EPHA2	FANCI	FRAP1	ACVR1B	EPHB4	SGK1	CD2
232	ERCC4	HUS1	FLT3	DCLRE1B	TUBB	AMHR2	C17orf70	MLL
233	CSF1R	MLH1	ACVR1B	DDR1	PMS2	SGK1	MCM3	EPHA2
234	DDR1	ULK1	UNG	MEN1	CALM2	DAPK3	MPG	MELK
235	EPHA3	RECQL5	G3BP1	AHCY	EXD2	CHFR	ERBB3	AKT2
236	ACVR1B	SDHC	JAK3	KPNA2	E2F5	ACVR1B	CHKA	ATM
237	CKMT2	NFKBIL2	CHKA	BUB1	DTD1	PRDX4	TSTA3	MAPK14
238	RAD51AP1	JAK1	CRIP2	RAD54L	DGKA	ACVR2B	ITK	EHMT1
239	PRMT1	CSNK1E	ERCC8	XRCC1	RAD54B	RECQL4	TK2	MCM7
240	PHF7	ATAD5	DTYMK	STRA13	SMUG1	ABL2	THRAP3	DGKG
241	MECP2	KHK	FGFR4	H2AFZ	ILF2	TSTA3	DDR1	CDK5
242	TIMELESS	C17orf70	DGKB	RPL35	MRE11A	FER	MAP4K3	MMS19
243	WRNIP1	DGKG	H2AFX	C12orf32	CSF1R	CLK3	PDGFRL	BMX
244	NEIL3	MTHFD2	RAD54L	TNKS	MAP3K8	MSH5	CKMT1B	RPA4
245	ATXN1	MAST2	MCM10	CDT1	EPHA3	DMPK	GTF2H4	WEE1
246	RAD52	CDK3	MCM3	KIAA0101	CSNK1G3	MOK	DKC1	ARMET
247	ERCC2	CHUK	EPHB3	RFC4	DGKB	EPHA5	MSH2	DGKA
248	MLH1	RAD54B	XPC	CDK7	MATK	CSNK2A2	XPA	DDB1
249	DMPK	TBK1	H2AFZ	MAPKAPK2	GALK2	GK	PI4KA	BUB1
250	UBE2N	SMUG1	TIMELESS	EPHB4	PRDX2	GINS3	MCM7	TERF1
251	GK2	MSH6	C12orf32	LDHA	PHF7	PSMC4	CDK7	AURKA
252	CRNN	DOK1	ITPK1	MELK	C1orf86	WRNIP1	AK2	SMUG1
253	XPC	MCM8	GINS4	DGKQ	KIAA0101	CDK2	CDK8	RAD51L3
254	MSH6	PARP1	DGKG	FANCC	ACVRL1	G3BP1	CBX3	CRIP2
255	SND1	KIT	CSNK1G3	FGR	CLK3	NUAK1	DDB2	MAP4K3
256	SDHC	CDK2	TBK1	FANCI	MSH5	POLL	CAMK2G	MCM4
257	ILK	NEIL2	AKT1	RAD50	KDELR2	PIP4K2B	CSF1R	BARD1
258	TDP1	SSR1	CKM	BLM	MPG	AKT1	RPA4	CDK2
259	MELK	EGFR	ENDOV	CDK2	CSNK2A2	ADK	RBBP8	NEK2
260	CLK2	GINS4	RPL27	EZH2	RPL13	EXD2	NEK2	RAD50
261	ERCC8	MSH2	DDR1	PRKDC	HIPK3	NEIL2	DAPK3	JAK3
262	HSPE1	PRPS1L1	RBBP8	TOPBP1	CLK1	MATK	TARDBP	CLK2
263	EXO1	RNF168	PIP4K2B	PDGFRL	CD2	INSR	MCM4	EPHA5
264	EPHA1	ERBB2	PSME2	JAK3	MELK	PMS2L3	AK1	RBBP8
265	TERF2IP	MECP2	DAPK3	ERBB4	ADK	FRAP1	CDK2	PLK3
266	RAD54B	TERF2	FGFR3	CKMT2	RAD51C	NTHL1	DGKG	RAD1
267	PIK3R4	CAMK2A	ITK	MYL4	GCK	UBE2B	RFC4	XRCC5
268	JAK2	CSK	FGR	CAMK2A	DAPK1	PRPS1L1	RTEL1	TBK1
269	EPHA4	XRCC2	MSH5	WDR77	DOK1	UBE2T	GCK	ITPKA
270	TUBB	GMNN	EGFR	EPHA2	MMS22L	CDK8	XRCC2	DAPK1
271	MSH3	RFC4	WDR77	CALM3	UBE2T	MAP3K8	RAD9B	DYRK3
272	EPHA5	XRCC1	MPG	ERCC5	POT1	PI4KA	CDK10	GTF2H3
273	BRCA1	GINS3	ACVRL1	GRWD1	TARS	TARDBP	CHUK	E2F5
274	UPF1	CKS2	MARK2	COL1A2	RAD23B	POLD1	TBK1	CLK3
275	TARS	LMO7	TSTA3	ATAD5	KIT	BRAF	EPHA8	GAK
276	ATM	EPHB3	FANCC	BPIFB1	PMS2L3	GRK4	HSPD1	GTF2H2
277	ACD	TK2	CCNH	GK2	DMPK	NEK2	C9orf156	ABL2
278	FANCL	SND1	EPHA2	EPHA4	POLL	TARS	TDG	KHK
279	EPHB2	MUTYH	DCK	CARM1	TARDBP	CDK4	PAICS	COASY
280	PMS2L3	CLK3	GINS1	NEK2	IRAK2	CSNK1G3	Ave. Mock	HSPD1
281	HUS1	JAK2	DMC1	RMI1	ZBTB20	PIP5K1A	CDK9	MSH2
282	MAPK14	CLK2	EPHA4	CLK2	NUAK1	KDR	POLL	PRMT5
283	MEN1	SHFM1	DNA2	TARDBP	CSNK1E	CLK1	MECP2	ERBB3
284	DDB2	FGFR4	PTMA	TIPIN	CALM3	CSNK1G2	DDB1	EPHB4
285	KIAA0101	PIP5K1A	BTK	CHKA	TK2	CLSPN	UNG	RAD23A
286	SLX1A	PRMT1	MCM8	RTEL1	TRIM28	LDHA	MYL4	CSF1R
287	KDELR2	DGKQ	CLK2	XRCC6	CAMK2B	TBK1	CSNK1G2	RBM4
288	ULK1	ILK	MDM4	FGFR2	CAMK2D	JAK3	CKB	HIPK3
289	JAK1	DYRK2	MELK	C1orf86	CLK2	FLT3	COASY	C17orf70
290	ERBB4	ACLY	DGKA	MOK	SGK1	CSNK1E	CSNK2A2	MSH6
291	ZBTB20	NONO	SLX1A	AXL	GK	RAD18	NUAK1	RTEL1
292	FGFR4	SLX1B	C11orf30	NUP205	CKMT2	KIT	RIPK2	CHUK
293	CDK2	GTF2H4	RDM1	FAM175A	ABL2	EPHA4	ABL2	WRNIP1
294	PGK1	POLG	RECQL	RDM1	EPHB3	NEIL3	DTD1	BLK
295	FGR	GALK1	CSNK2A1	TP53	NME5	SHFM1	DVL3	PTMA
296	GINS4	SOX4	KDR	DDB1	AK2	IRAK2	ERCC3	PIK3R4
297	CDK4	EME1	UBE2A	CDK10	APTX	RIPK2	FES	CDK6
298	RFC4	EPHB2	TRAF4	CDK4	CALM1	CSF1R	XRCC1	ZBTB20
299	SSR1	AXL	JAK1	POLH	MCM5	PMS2	CSK	MUTYH
300	C1orf86	NEIL3	HSPE1	RPA3	POLN	JAK2	CSNK1G3	EPHB1
301	ACVRL1	CDK7	SSBP1	DAPK3	BTK	PIP5K1B	POLI	CHFR
302	SGK1	FUS	CHUK	FANCA	INSR	PDGFRL	PTMA	SGK1
303	DGKQ	ATM	CHFR	CSNK1G3	XRCC6	APTX	FANCL	CKMT1B
304	TK2	DAPK1	CALM3	UBE2T	AK1	FGR	SNRPF	JAK2
305	PRPS1L1	PMS2L3	TDG	CAMK2D	CAMK2A	TUBB	EPHA3	CKMT2
306	ACLY	CKM	CAMK4	RAD23A	RIPK2	TK2	PMS2	ARAF
307	EXD2	TARDBP	EPHA8	EIF4A3	ACVR2A	ULK1	CALM1	CALM2
308	SLX1B	KDELR2	BRCC3	SMUG1	PIP4K2B	TERF2IP	PIP4K2B	IRAK1
309	NUP205	BUB1	ALKBH3	BRCA2	CSK	STK24	DYRK1A	CDK3
310	CDK9	UPF1	GTF2H2	CDK3	CHUK	SMUG1	SMUG1	MAPKAPK2
311	EPHB3	UIMC1	COASY	SGK1	RTEL1	ITPKB	MATK	AXL
312	TDG	RAD23A	CAMK2G	CSNK2A2	CARM1	RAD51L3	MAPKAPK2	ADRBK1
313	POLL	PRKAA1	RPL13	GTF2H1	STK24	MARK2	PRKAA1	TARDBP
314	POLG	PMS2	DAPK1	STK24	TDG	KHK	PIK3R4	CAMK2B
315	MSH4	MGMT	CDK4	PARP2	EPHB1	DGKA	MSH3	DYRK2
316	EZH2	PRDX2	ALKBH2	CAMK4	XRCC3	XRCC1	DMC1	ULK1
317	DGKG	POLL	CLK3	ERBB2	FER	ACVRL1	EPHB2	ADK
318	RECQL4	TREX1	UIMC1	WDR48	CDK3	XPC	MRE11A	BRAF
319	TP53	CKB	CKMT2	TSTA3	RAD23A	ACVR1	TDP1	CDK4
320	NONO	NEK2	WRNIP1	DYRK3	PAICS	DGUOK	MSH4	MSH4
321	ARAF	FANCI	COL1A2	BRAF	CDK7	DGKB	APTX	EZH2
322	TP53BP1	ITK	APTX	DGKG	XRCC2	DDR1	TERF1	NTHL1
323	ABL1	TP53	OGG1	POLD1	CHFR	PRKAA1	SNRPE	ERBB2
324	CDK7	PRMT5	ALK	ERCC8	LDHA	XRCC6	ITPKA	DOK1
325	TERF2	ZBTB20	C1orf86	GTF2H2	FANCA	MAP4K3	JAK1	SSBP1
326	BLM	UBE2T	CDK2	BRCC3	EPHB6	POLM	SPO11	PRKD3
327	CLOCK	RECQL4	PDGFRL	GINS4	JAK1	INSRR	MAST2	UBE2A
328	POLQ	COASY	NUAK1	EPHA1	EPHA5	TP53BP1	EPHB4	ERCC2
329	NTHL1	RAD50	PRKD3	ILF2	CSNK1G2	XPA	NEIL3	APEX2
330	GMNN	DDB2	ZDHHC17	MDM2	AMHR2	PTK2B	TARS	PHF7
331	VCP	TNKS	BUB1	C17orf70	EPHB4	MCM7	MAPK14	ERCC8
332	IARS	TERF2IP	EPHA5	ALKBH2	ATXN1	AK1	CSNK1E	ACVR2B
333	RRM2B	RPL13	FANCF	MNAT1	BMPR1B	BTK	POLQ	MARK2
334	GTF2H4	AMHR2	PAICS	TP53BP1	MCM6	IARS	KDR	PI4KA
335	DCK	DDR1	CAMK2D	MMS19	XPC	SND1	EHMT1	FGFR4
336	SOX4	EZH2	CBX3	APEX2	NEK2	MYL4	GK2	STK24
337	POT1	CKMT1B	DCLRE1B	TERF2IP	MOK	CSK	UBE2T	VCP
338	BAT3	ACVR2A	MMS19	PRDX2	GRK4	MAST2	CSNK2A1	DMC1
339	APTX	ACVRL1	TARS	ARAF	ARAF	RPL35	DTYMK	MCM2
340	POLM	RAD52	DYRK3	APTX	PI4KA	RIOK2	FLT1	TUBB
341	RAD23B	CALM1	TK2	ITK	BMPR2	FGFR1	DYRK2	CKB
342	ARMET	ZDHHC17	DGKQ	MCM8	BLK	MAPK14	FGR	NCBP2
343	ERCC5	ERCC5	PRPS1L1	PMS2L3	DCK	CLK2	ZDHHC17	CSNK1A1
344	CALM1	NTHL1	XRCC2	CAMK2G	BRAF	CAMK4	AKT1	Ave. Mock
345	PRMT5	XPC	THRAP3	SLX1B	CKM	GALK1	GK	ACVRL1
346	GINS2	BMX	FAM175A	MCM6	TERF1	BUB1B	NEIL2	UBE2T
347	NEK2	MCM5	RAD9B	POT1	PRDX4	DYRK3	RECQL	BTK
348	ITK	ITPKB	GTF2H1	ZBTB20	ITPKB	ABL1	PIP5K1A	POLM
349	RAD23A	ERBB3	MEN1	EPHB3	FLT4	CAMK2B	PCNA	BMPR2
350	DVL3	CDK5	RAD51	MRPS12	TERF2IP	TREX2	ERBB2	MATK
351	FGFR1	IFNGR2	INSR	DYRK2	FLT3	RAD51C	UBE2A	CSK
352	IFNGR2	CKMT2	RAD54B	XRCC2	ERCC8	RAD54L	TERF2IP	ATXN3
353	AHCY	MELK	MYL4	RPA4	PRPS1L1	ITK	NME5	ITPK1
354	RAD51C	AKT2	DGUOK	CLK3	POLQ	DAPK1	PARP2	MSH3
355	TREX2	FEN1	BRAF	GTF2H3	MAPK14	TERF1	IP6K2	CAMK2A
356	TERF1	RAD51L3	MAP4K3	PRKD3	CKB	PAICS	AMHR2	DAPK3
357	NUDT1	RTEL1	MRPS12	CALM2	MSH6	CALM1	ZBTB20	RIPK2
358	MNAT1	PIP5K1B	KDELR2	NME5	ABL1	VCP	FRK	CAMK4
359	PIP5K1A	BLM	DVL3	CSF1R	ITK	CHKA	FGFR3	DGUOK
360	TBK1	MRE11A	C15orf42	TERF1	MAP4K3	HIPK3	CRIP2	RAD54B
361	CDK3	HELQ	NEK2	FLT1	RPL35	CDK3	ALK	PIP4K2B
362	GTF2H3	INSRR	CSNK2A2	MAPK14	PLK3	MCM3	KDELR2	KDELR2
363	PAICS	TERF1	PMS2L3	ITPKB	ULK1	FYN	JAK2	UNG
364	MDM4	MARK2	ITPKA	PTK2B	FRK	DOK1	GALK2	IRAK2
365	APEX2	ITPK1	JAK2	MCM2	VCP	CDK5	RBM4	DMPK
366	AXL	TRIM28	HSPD1	IP6K2	IP6K2	EPHB3	ACVR1	PIP5K1B
367	FUS	PHF7	MLH3	ITPK1	PRKD3	MELK	EPHA1	DVL3
368	MCM8	PLK2	RPA4	PLK3	PLK2	BMPR1A	GINS2	CALM3
369	FEN1	TRAF4	MOK	JAK1	RAD9B	ARAF	ARAF	EXD2
370	MGMT	FES	TUBB	CDC6	DGUOK	AK3L1	CD2	CHKA
371	CDK5	XRCC3	POLQ	DGKB	FLT1	EPHB2	TERF2	POLD1
372	TIPIN	AHCY	MTHFD2	XRCC5	ACVR1	AKT2	CDK4	POLI
373	MRE11A	LIG1	RAD23A	WRNIP1	GINS2	GCKR	BMX	MCM10
374	DYRK2	PLK3	KIT	PLK2	DYRK2	DVL3	NCBP2	PGK1
375	PLK3	APEX1	CD2	COASY	FANCL	ERBB4	FRAP1	LMO7
376	ERBB3	CLOCK	CDK10	KIT	ILK	MRE11A	IRAK2	APTX
377	MCM6	GINS2	ACD	MSH5	DGKQ	ZDHHC17	MDM4	ABL1
378	HELQ	POLQ	FRAP1	MLL	GAK	XRCC3	JAK3	TERF2IP
379	WEE1	FANCA	SSR1	APEX1	KHK	BMX	XRCC5	G3BP1
380	MMS22L	CDK9	XRCC5	KDELR2	TBK1	BMPR1B	ADK	AMHR2
381	RAD54L	IP6K2	UBE2T	MPG	ZDHHC17	TP53	ACVRL1	HNRNPA2B1
382	MCM3	RIPK2	RAD51C	PIP4K2B	EPHB2	IP6K2	BTK	GALK1
383	ZDHHC17	TREX2	ULK1	INSRR	CDK9	CCT4	RAD23A	EGFR
384	AK2	POLM	ATXN1	PIP5K1B	EPHA2	EGFR	STK24	AK1
385	TRIM28	TP53BP1	MCM4	CHUK	PIP5K1A	CKMT1B	POT1	NEIL2
386	PCNA	PTK2B	VCP	KHK	CSNK1D	APEX2	EPHB6	GCK
387	FGFR2	CDK11B	FANCL	GTF2H4	AK3L1	PHF7	BMPR1A	MTHFD2
388	MCM2	GTF2H3	PRDX4	PIK3R4	ACVR2B	CSNK1D	ACVR2A	PAXIP1
389	POLN	DYRK3	DOK1	NEIL3	FYN	CAMK2D	MELK	MMS22L
390	GALK1	MCM2	MMS22L	POLI	FGFR4	MLL	SLX1B	MLH3
391	IP6K2	RRM2B	LDHA	MLH3	EPHA7	CDC6	GALK1	EPHB3
392	MYL4	CALM2	RTEL1	ADRBK1	MLL	DGKG	ACVR1B	DGKQ
393	PTK2B	BRCA2	MDM2	AK1	JAK2	GCK	DGKA	POLL
394	DOK1	MSH4	ITPKB	INTS7	POLD1	MSH6	AKT2	RPL27
395	MPG	POLN	EPHB4	RAD54B	EPHA4	ITPK1	CSNK1A1	JAK1
396	EGFR	BAT3	DMPK	RECQL	ATM	CKB	RAD51L3	CSNK1E
397	CARM1	APEX2	XRCC1	TDG	RBM4	CDK11B	CAMK4	KDR
398	COASY	WRN	C9orf156	NUAK1	MCM7	ERBB3	CDK3	MGMT
399	TNKS	VCP	CAMK2A	PHF7	PIK3R4	CALM2	CHEK1	DTD1
400	FANCI	FGFR2	PLK3	PAICS	CDK2	DGKQ	EXD2	DDR1
401	LIG1	RPA3	CDK3	TUBB	TIPIN	BUB1	SND1	BMPR1A
402	G3BP1	POT1	EME1	NEIL2	AKT2	FRK	AXL	RIOK2
403	MLL	KPNA2	AK1	EPHA8	TERF2	KDELR2	PHF7	TK2
404	ITPKB	ITPKA	PARP2	C15orf42	CDK5	ILF2	KIT	AK3L1
405	AKT2	BRCA1	PGK1	RBM4	FRAP1	ILK	EPHB3	DGKB
406	EPHA2	PRKDC	CKMT1B	CSNK1E	FGR	MDM4	PLK2	FRAP1
407	XRCC5	MNAT1	BMX	PCNA	ADRBK2	GK2	TTK	NEIL3
408	H2AFX	RNF8	MNAT1	CSNK1G2	ITPK1	ADRBK2	BMPR2	XRCC1
409	NCBP2	LDHA	AK3L1	MAP4K3	XRCC5	PLK3	CDK11B	RAD9B
410	INSRR	RAD51C	NME5	CKB	FGFR2	AXL	EPHA2	DNA2
411	KPNA2	CSNK1G2	DYRK2	NCBP2	AXL	TOPBP1	CALM3	MCM6
412	COPB2	CARM1	MAPK14	BMX	CDK11B	MSH3	EPHA5	SND1
413	DYRK3	XRCC6	CSF1R	TK2	PCNA	FLT4	ERBB4	CCNH
414	BLK	MYL4	NEIL2	MCM7	PIP5K1B	POLQ	WRNIP1	NME5
415	LDHA	GTF2H5	KHK	ZDHHC17	DVL3	GAK	EPHB1	ACVR1
416	MSH5	AKT1	PIP5K1A	HSPD1	PDGFRL	PRKDC	IRAK1	TSTA3
417	PDGFRL	HSP90B1	CSNK1E	MSH3	INTS7	EPHB6	TOP2A	ITPKB
418	GTF2H1	C15orf42	PHF7	RPL27	COASY	POT1	CAMK2B	PRDX2
419	FANCA	CCT5	C17orf70	CHFR	PGK1	CAMK2A	CAMK2D	CAMK2G
420	TOPBP1	G3BP1	MAST2	MDM4	FGFR3	MCM4	BLK	ITK
421	ITPK1	CDC6	COPB2	DMPK	LIG4	GINS2	GRK4	EPHA8
422	GTF2H5	MLL	POLI	MCM3	RIOK2	RRM2B	ERCC8	TERF2
423	WRN	NUDT1	CALM2	RAD51	DGKG	CDC45	XPC	SPO11
424	XRCC3	MDM2	PRDX2	EXD2	ERBB4	EPHA1	ATXN1	KIT
425	INTS7	DCK	PRKAA1	DDX47	AKT1	GTF2H1	ULK1	RPA3
426	ACVR2A	MCM3	TERF2IP	AURKA	MCM2	MCM6	FGFR1	BUB1B
427	RAD51L3	TDG	EXD2	VCP	PRKAA1	FLT1	BUB1	INSRR
428	RBM4	RAD54L	CSK	RAD23B	BMPR1A	PLK2	ITPKB	DYRK1A
429	PLK2	FLT1	RAD23B	ITPKA	GALK1	BLK	EGFR	ZDHHC17
430	CCT4	IARS	CSNK1D	DVL3	MYL4	CALM3	CSNK1D	FANCL
431	TREX1	CSNK1D	NEIL3	TARS	CDC45	CKMT2	PIP5K1B	RECQL
432	GAK	GTF2H1	SMUG1	MTHFD2	FES	GINS1	ACVR2B	CAMK2D
433	PRKAA1	BMPR1A	POT1	NTHL1	GINS1	RBM4	FLT3	EPHA1
434	XRCC6	MCM6	ZBTB20	CKMT1B	POLM	ATM	ATM	FLT4
435	CDK11B	MDM4	TARDBP	CCT5	NCBP2	FES	AK3L1	FGFR3
436	FGFR3	DVL3	TERF2	POLM	INSRR	RPA3	BRAF	CDC6
437	RIPK2	MCM4	NCBP2	INSR	DYRK3	GALK2	INSRR	ADRBK2
438	CSNK1G2	TOPBP1	CKB	MCM4	COPB2	WRN	PGK1	CDK11B
439	PIP5K1B	CLSPN	TP53	G3BP1	TP53	TERF2	RPA2	CALM1
440	TRAF4	FGFR3	CDK11B	TERF2	FGFR1	ITPKA	RIOK2	FGR
441	HSP90B1	BLK	IP6K2	POLN	MDM2	FANCD2	HIPK3	FRK
442	CSNK1D	GAK	GINS2	RAD51C	RPL27	BRCA2	MARK2	EPHA4
443	FLT1	NCBP2	TDP1	ATXN3	TREX2	RBBP8	DYRK3	XRCC2
444	FES	RPL35	RPA2	DOK1	RAD54L	CHUK	CALM2	CDC45
445	MDM2	INTS7	BMPR1A	RIOK2	RRM2B	MPG	BMPR1B	INSR
446	ITPKA	MMS22L	GTF2H4	UBE2B	BRCA2	ALK	BARD1	FGFR2
447	TOP2A	CCT4	TERF1	POLQ	ADRBK1	TDG	EPHA4	PAICS
448	RNF8	MPG	MSH3	MARK2	ITPKA	INTS7	BUB1B	TP53
449	DKC1	PCNA	NFKBIL2	FGFR3	CDK4	RTEL1	CDK6	ERBB4
450	AKT1	MCM7	CSNK1G2	CSK	RPA1	COPB2	FLT4	FLT3
451	MCM7	RBM4	PLK2	MMS22L	GTF2H1	SNRPE	CDC2	CDC2
452	RBBP8	MSH5	POLL	BARD1	TOPBP1	MCM10	DMPK	FLT1
453	PRKDC	MSH3	PMS2	TREX2	MCM10	PCNA	TP53	UBE2B
454	LIG4	BUB1B	ADRBK1	RAD51L3	RAD51L3	DDB1	DGKB	PCNA
455	MCM4	XRCC5	PIK3R4	PIP5K1A	DDX47	FGFR2	ADRBK2	COPB2
456	MARK2	COPB2	SLX1B	ILK	RPA3	TTK	POLN	GK2
457	BUB1B	DKC1	POLN	BMPR1A	EPHA1	NCBP2	ADRBK1	TP53BP1
458	ILF2	TIPIN	PIP5K1B	CDK11B	CDC6	ERCC8	APEX2	POLQ
459	FANCE	ILF2	ILK	POLL	ERBB3	MDM2	PRDX4	CCT4
460	BMPR1A	DDB1	RBM4	SND1	DNA2	CHEK1	FER	BMPR1B
461	CDC6	ALK	RRM2B	GINS1	RPA2	CKM	EPHA7	EPHA7
462	DDB1	RIOK2	APEX2	GINS2	AURKA	MCM2	FGFR2	PIP5K1A
463	RPL13	RAD51	INSRR	FANCL	TOP2A	EPHA7	GAK	GALK2
464	CDC45	CDC45	BARD1	ALK	EGFR	POLN	INSR	TOP2A
465	APEX1	E2F5	PCNA	WRN	MARK2	DDX47	DAPK1	GINS2
466	DDX47	TTK	SND1	PMS2	TTK	RPA1	FYN	RAD51C
467	ALK	CHEK1	CSNK1A1	RBBP8	BARD1	LIG4	PRDX2	RRM2B
468	TTK	LIG4	UBE2B	RRM2B	CDK6	CCT5	FGFR4	RAD23B
469	RPL27	RPA2	CDK6	IRAK1	WRN	CDK9	DGKQ	TARS
470	DNA2	DDX47	IRAK1	CDC45	MCM4	RPA2	CAMK2A	FYN
471	CDK6	BARD1	RAD51L3	MCM10	TP53BP1	IRAK1	DGUOK	ALK
472	ADRBK1	ADRBK1	WEE1	E2F5	PRKDC	ADRBK1	CDC45	FER
473	RAD51	GINS1	PRKDC	PRDX4	APEX1	TIPIN	GCKR	TREX2
474	RPA2	AURKA	WRN	COPB2	BUB1B	FGFR3	RRM2B	FGFR1
475	AURKA	TOP2A	POLM	BUB1B	DDB1	BARD1	VCP	PRDX4
476	RIOK2	MCM10	RIOK2	CDK6	WEE1	XRCC5	POLM	GCKR
477	E2F5	RBBP8	AURKA	WEE1	SNRPF	DKC1	PTK2B	RPA2
478	BARD1	CSNK1A1	TTK	DNA2	RAD51	AURKA	KHK	TDG
479	PSMC4	IRAK1	EIF4A3	RPA2	ALK	CSNK1A1	WRN	GRK4
480	EPHA8	CDK6	BUB1B	CSNK1A1	DKC1	DCK	CDK5	PMS2
481	RPA1	SNRPE	CDC45	CDC2	CHEK1	RAD51	WEE1	POLN
482	CSNK1A1	DNA2	PSMC4	TOP2A	FANCE	CDC2	UBE2B	PTK2B
483	GINS1	CDC2	TREX2	CCT4	CCT5	SNRPF	PLK1	ILK
484	MCM10	WEE1	DDX47	TTK	SNRPE	DNA2	AURKA	WRN
485	CHEK1	SNRPF	TOP2A	RPA1	IRAK1	TOP2A	TREX2	TTK
486	CDC2	EPHA8	TPX2	SNRPE	EPHA8	CDK6	ILK	GK
487	IRAK1	FANCD2	CDC2	SNRPF	CSNK1A1	WEE1	DDX47	PLK1
488	SNRPE	PSMC4	RPA1	XAB2	CDC2	TPX2	PSMC4	SNRPE
489	SNRPF	RPA1	SNRPE	RRM2	PSMC4	EPHA8	RPA1	SNRPF
490	XAB2	RRM1	SNRPF	RRM1	XAB2	RRM1	PRKDC	RRM2
491	RRM2	XAB2	XAB2	PSMC4	RRM1	RRM2	XAB2	TPX2
492	TPX2	TPX2	RRM1	PLK1	TPX2	PLK1	TPX2	PSMC4
493	RRM1	RRM2	PLK1	TPX2	RRM2	XAB2	RRM2	XAB2
494	PLK1	PLK1	RRM2	CHEK1	PLK1		RRM1	RRM1
